# Supplementary material for: Molecular remodeling of adipose tissue is associated with metabolic recovery after weight loss surgery
Source: Springer Nature journal article supplement (doi:10.1186/s12967-022-03485-6), 2022-06-23
Supplement: MOESM1 [file 23199650]

## **Molecular remodeling of adipose tissue is associated with metabolic recovery after weight loss surgery**

Annie Bouchard-Mercier<sup>1,2†</sup> (annie.bouchard@valbiotis.com)

Juan de Toro-Martín<sup>1,2†</sup> (juan.de-toro-martin.1@ulaval.ca)

Mélanie Nadeau<sup>3</sup> (melanie.nadeau@criucpq.ulaval.ca)

Odette Lescelleur<sup>3</sup> (odette.lescelleur@criucpq.ulaval.ca)

Stéfane Lebel<sup>3</sup> (stefane.lebel@fmed.ulaval.ca)

Denis Richard<sup>3</sup> (denis.richard@criucpq.ulaval.ca)

Laurent Biertho<sup>3</sup> (laurent.biertho@criucpq.ulaval.ca)

André Tchernof<sup>3</sup> (andre.tchernof@criucpq.ulaval.ca)

Marie-Claude Vohl<sup>1,2\*</sup> (marie-claude.vohl@fsaa.ulaval.ca)

<sup>1</sup>School of Nutrition, Université Laval, 2440 Hochelaga Blvd, Quebec City, Quebec, Canada, G1V 0A6.

<sup>2</sup>Centre Nutrition, Santé et Société (NUTRISS)-Institut sur la nutrition et les aliments fonctionnels (INAF), Université Laval, 2440 Hochelaga Blvd, Quebec City, Quebec, Canada, G1V 0A6.

<sup>3</sup>Centre de recherche de l'Institut universitaire de cardiologie et de pneumologie de Québec (IUCPQ), 2725 chemin Sainte-Foy, Quebec City, Quebec, Canada, G1V 4G5.

†These authors share first authorship. The first author was determined alphabetically.

\*Corresponding author:

Marie-Claude Vohl

Institut sur la nutrition et les aliments fonctionnels (INAF)

Université Laval – Pavillon des Services (suite 2729K)

G1V 0A6

Quebec (QC) – Canada

418 656-2131 (ext 4676)

[marie-claude.vohl@fsaa.ulaval.ca](mailto:marie-claude.vohl@fsaa.ulaval.ca)

## Supplementary Material

**Table S1. Participants characteristics**

|                          | Preoperative |              |              |              |             |              |                | Postoperative |              |              |               |              |                |                |
|--------------------------|--------------|--------------|--------------|--------------|-------------|--------------|----------------|---------------|--------------|--------------|---------------|--------------|----------------|----------------|
|                          | SG           | RYGB         | BPD-DS       | P-value      | SG vs RYGB  | SG vs BPD-DS | RYGB vs BPD-DS | SG            | RYGB         | BPD-DS       | P-value       | SG vs RYGB   | SG vs BPD-DS   | RYGB vs BPD-DS |
| N (male)                 | 9 (5)        | 5 (3)        | 7 (2)        | 0.5          |             |              |                |               |              |              |               |              |                |                |
| Age (years)              | 53.4 ± 8.1   | 55.7 ± 7.8   | 47.8 ± 7.1   | 0.4          | 0.9         | 0.4          | 0.2            |               |              |              |               |              |                |                |
| Height (cm)              | 168.6 ± 8.6  | 166.4 ± 9.7  | 167.1 ± 8.9  | 0.7          | 0.9         | 0.9          | 1.0            |               |              |              |               |              |                |                |
| Body weight (kg)         | 123.5 ± 18   | 106 ± 9.1    | 139.8 ± 15.3 | <b>0.01</b>  | 0.1         | 0.1          | <b>0.004</b>   | 90.8 ± 12.8   | 71.5 ± 10.1  | 81.4 ± 10.0  | <b>0.02</b>   | <b>0.02</b>  | 0.3            | 0.3            |
| BMI (kg/m <sup>2</sup> ) | 43.3 ± 3.8   | 38.4 ± 2.8   | 50.2 ± 5.5   | <b>0.005</b> | 0.1         | <b>0.01</b>  | <b>0.0004</b>  | 31.9 ± 3.5    | 25.8 ± 2.5   | 29.3 ± 4.1   | <b>0.02</b>   | <b>0.02</b>  | 0.3            | 0.2            |
| ΔBMI                     |              |              |              |              |             |              |                | -11.4 ± 3.1   | -12.6 ± 2.6  | -20.9 ± -2.9 | <b>0.0001</b> | 0.7          | <b>0.00001</b> | <b>0.0004</b>  |
| %TWL                     |              |              |              |              |             |              |                | 26.2 ± 6.5    | 31.9 ± 6.4   | 41.7 ± 4.6   | <b>0.0003</b> | 0.2          | <b>0.0002</b>  | <b>0.03</b>    |
| %EWL                     |              |              |              |              |             |              |                | 56.7 ± 14.8   | 80.6 ± 16.1  | 78.6 ± 15.1  | <b>0.008</b>  | <b>0.03</b>  | <b>0.03</b>    | 1.0            |
| Neck circ. (cm)          | 44.7 ± 2     | 43.6 ± 3.8   | 45.1 ± 3.3   | 0.4          | 0.8         | 1.0          | 0.7            | 39.7 ± 2.6    | 36.8 ± 2.6   | 35.2 ± 2.8   | <b>0.01</b>   | 0.2          | <b>0.01</b>    | 0.6            |
| Waist circ. (cm)         | 138.7 ± 9.3  | 125.9 ± 5.2  | 147.9 ± 9.8  | <b>0.002</b> | <b>0.04</b> | 0.1          | <b>0.001</b>   | 111.7 ± 8.6   | 93.4 ± 5.5   | 104.1 ± 8.5  | <b>0.006</b>  | <b>0.002</b> | 0.2            | 0.1            |
| Fat mass (kg)            | 59.4 ± 13.2  | 47.9 ± 7.8   | 78.3 ± 7.5   | <b>0.003</b> | 0.1         | <b>0.006</b> | <b>0.0003</b>  | 30.6 ± 11.2   | 17.2 ± 5.1   | 26.8 ± 9.1   | 0.1           | 0.1          | 0.7            | 0.2            |
| Fat free mass (kg)       | 65.6 ± 10.8  | 60.8 ± 11.7  | 66.1 ± 6.2   | 0.2          | 0.7         | 1.0          | 0.6            | 58.5 ± 10.7   | 54.7 ± 12.2  | 56.3 ± 5.1   | 0.4           | 0.8          | 0.9            | 1.0            |
| Adipocyte size (µm)      | 86.1 ± 7.4   | 84.4 ± 10.8  | 88.8 ± 5.1   | 0.5          | 0.9         | 0.8          | 0.6            | 70.1 ± 5.3    | 55.3 ± 5.1   | 58.5 ± 7.9   | <b>0.0002</b> | <b>0.001</b> | <b>0.006</b>   | 0.7            |
| SBP                      | 136 ± 13.2   | 139.8 ± 26.6 | 143.1 ± 16.5 | 0.8          | 0.9         | 0.7          | 0.9            | 128.9 ± 14.2  | 142.2 ± 29.2 | 129.9 ± 12.3 | 0.5           | 0.4          | 1.0            | 0.5            |
| DBP                      | 81.9 ± 4.5   | 81.6 ± 10.7  | 82.7 ± 6.8   | 1.0          | 1.0         | 1.0          | 1.0            | 76.6 ± 11.8   | 82.2 ± 16.9  | 74.3 ± 8.8   | 0.4           | 0.7          | 0.9            | 0.5            |

SG, sleeve gastrectomy. RYGB, Roux-en-Y gastric bypass. BPD-DS, biliopancreatic diversion with duodenal switch. N, number of participants. BMI, body mass index. ΔBMI, delta BMI, %TWL, percentage of total body weight loss, %EWL, percentage of excess body weight loss. Circ, circumference. SBP and DBP, systolic and diastolic blood pressure, respectively. P-values are obtained from one-way ANOVA adjusted by age, sex and BMI. Post-hoc Tukey test was used for multiple comparisons among surgery group

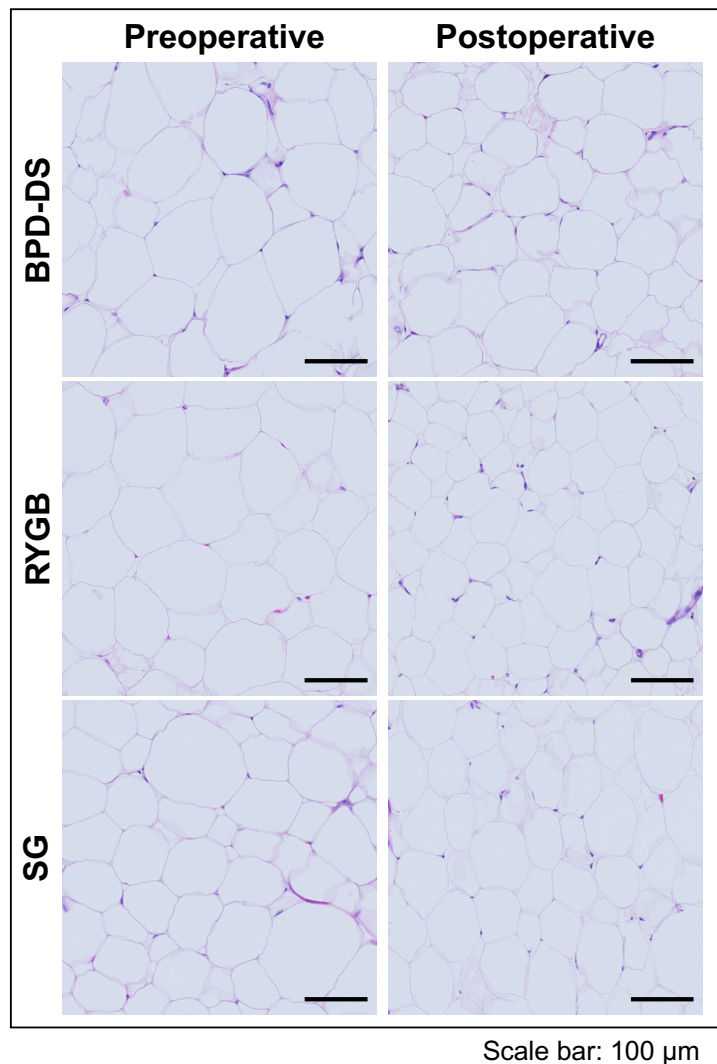

**Figure S1. Subcutaneous adipose tissue morphology before and after the bariatric surgery.** Micrographs were taken from histological sections of subcutaneous adipose tissue biopsies obtained during surgery (preoperative) and 12 months after (postoperative) and stained with hematoxylin/eosin. Preoperative and postoperative images shown were taken from the same participant. All the representative images shown were taken from women. The mean adipocyte sizes  $\pm$  standard deviation of each participant are given below. From left to right and top to bottom: biliopancreatic diversion with duodenal switch (BPD-DS,  $88.3 \pm 22.6$  vs  $55.9 \pm 15.9$ ), Roux-en-Y gastric bypass (RYGB,  $84.9 \pm 19.8$  vs  $59.5 \pm 13.9$ ) and sleeve gastrectomy (SG,  $82.4 \pm 20.7$  vs  $69.9 \pm 13.8$ ). All images were taken with a light microscope at 20x magnification.
